# Supplementary material for: Identification of biomarkers in common chronic lung diseases by co-expression networks and drug-target interactions analysis
Source: PubMed Central journal article supplement (PMC6969427; doi:10.1186/s10020-019-0135-9), 2020-01-17

## Selecting optimal $\beta$ parameter for COPD

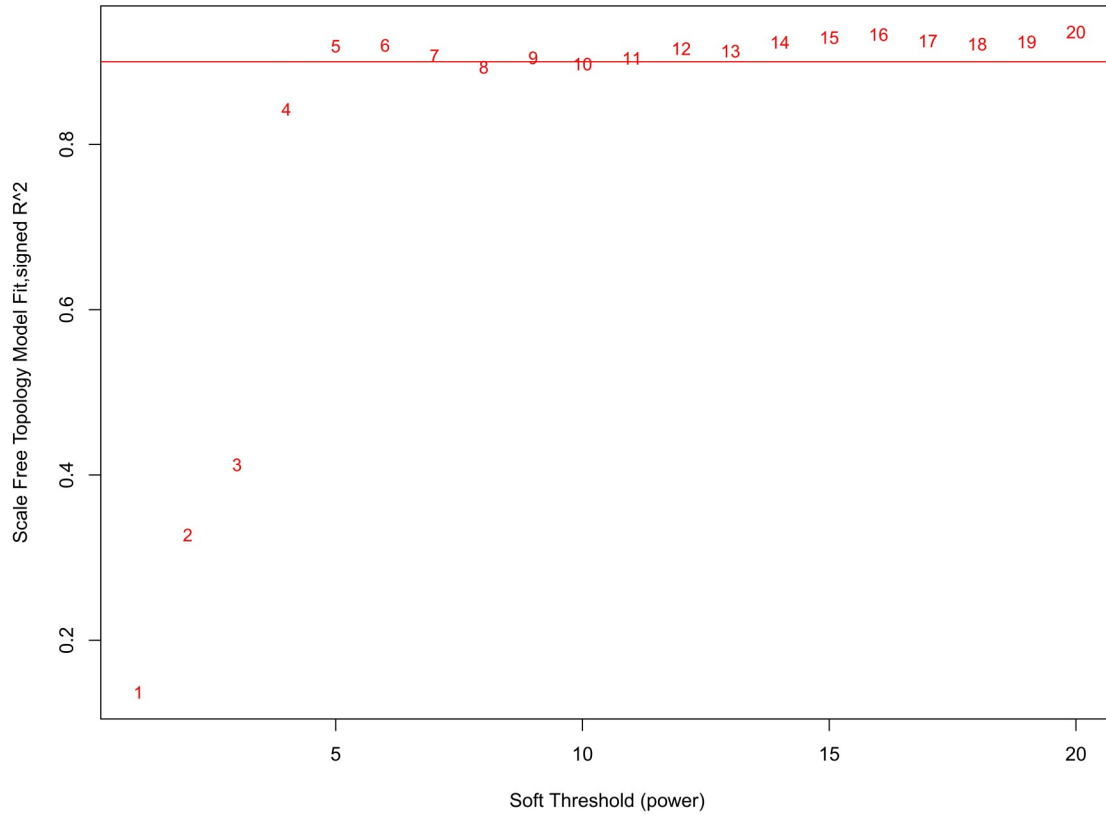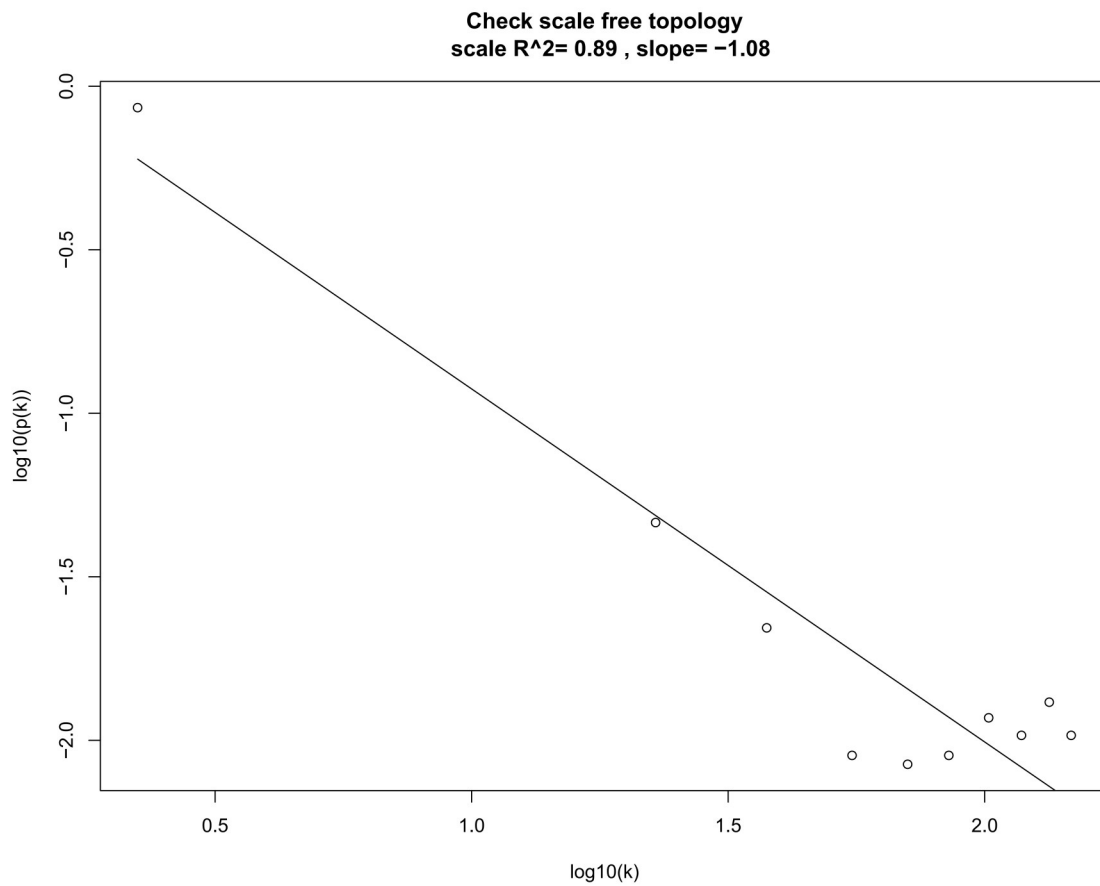

# Selecting optimal $\beta$ parameter for Asthma

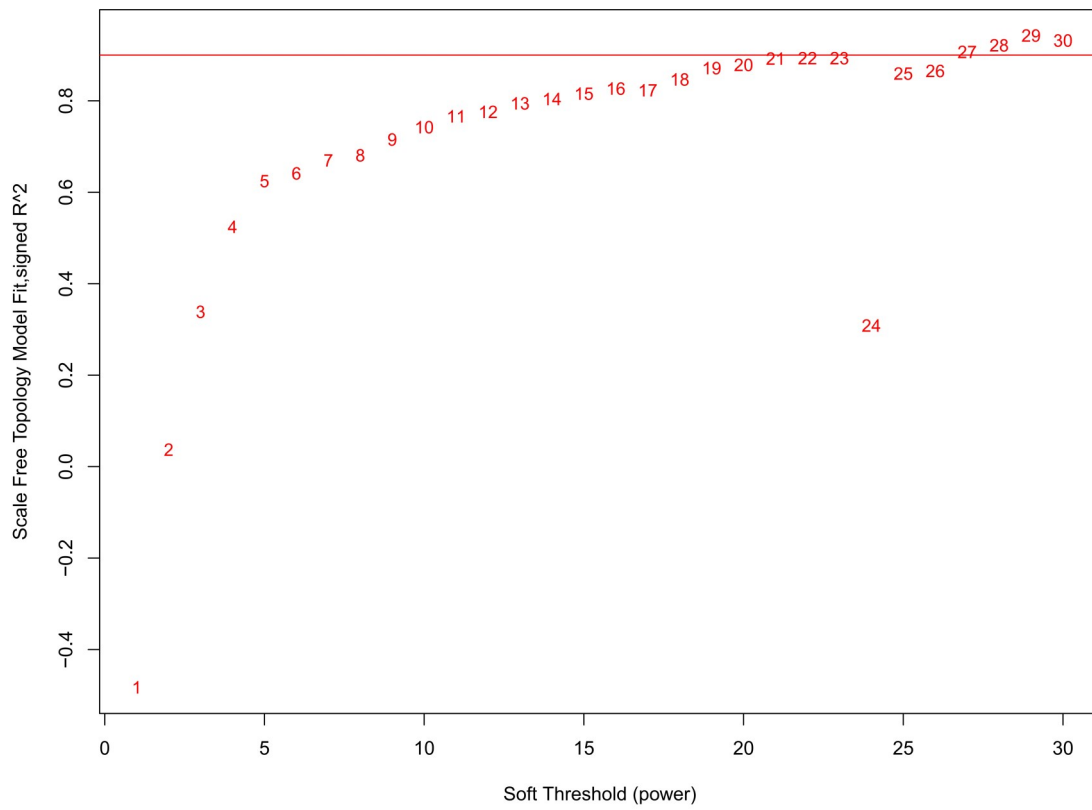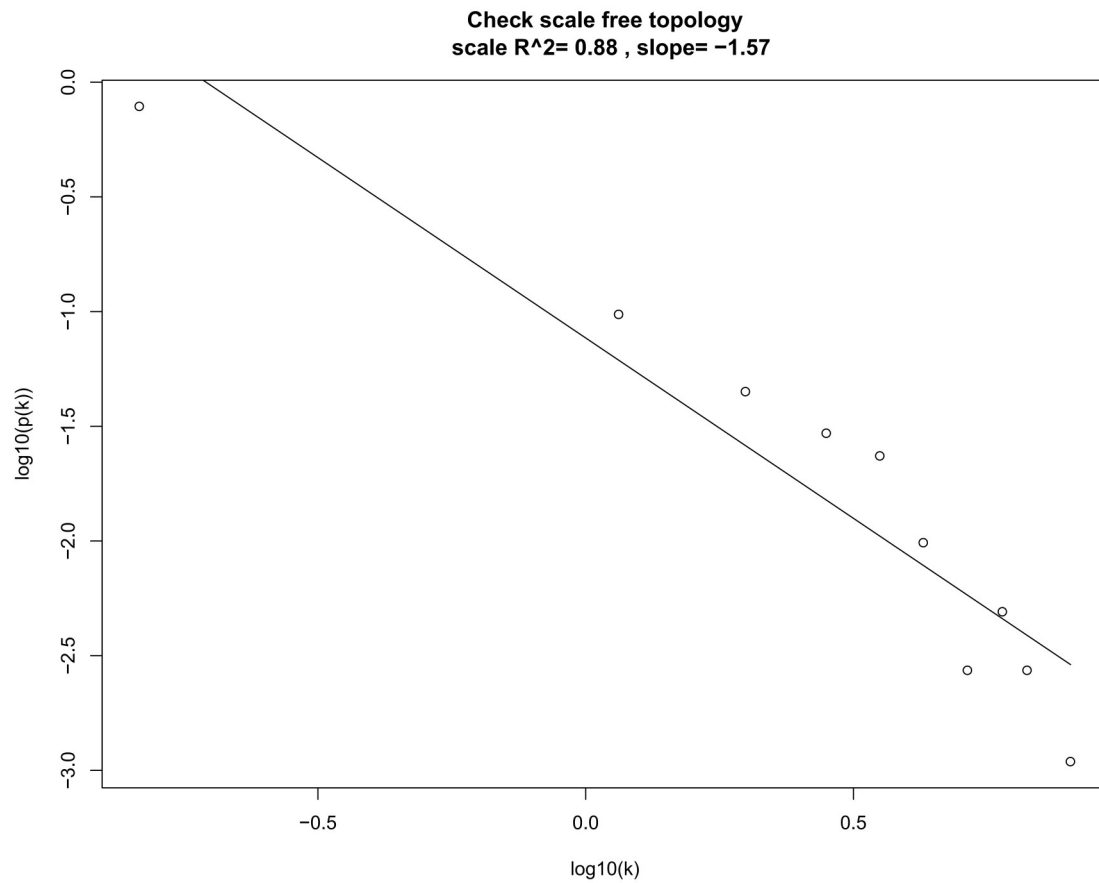

## Selecting optimal $\beta$ parameter for IPF

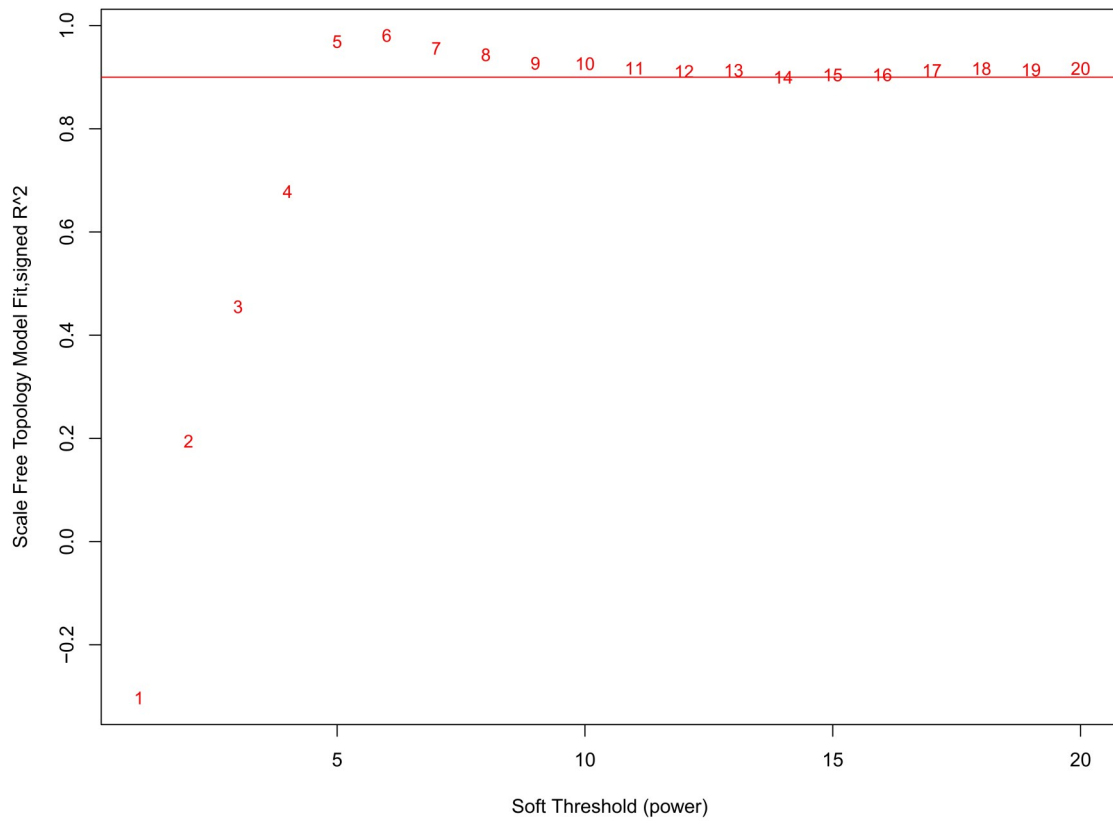

Check scale free topology  
scale  $R^2= 0.89$  , slope= -1

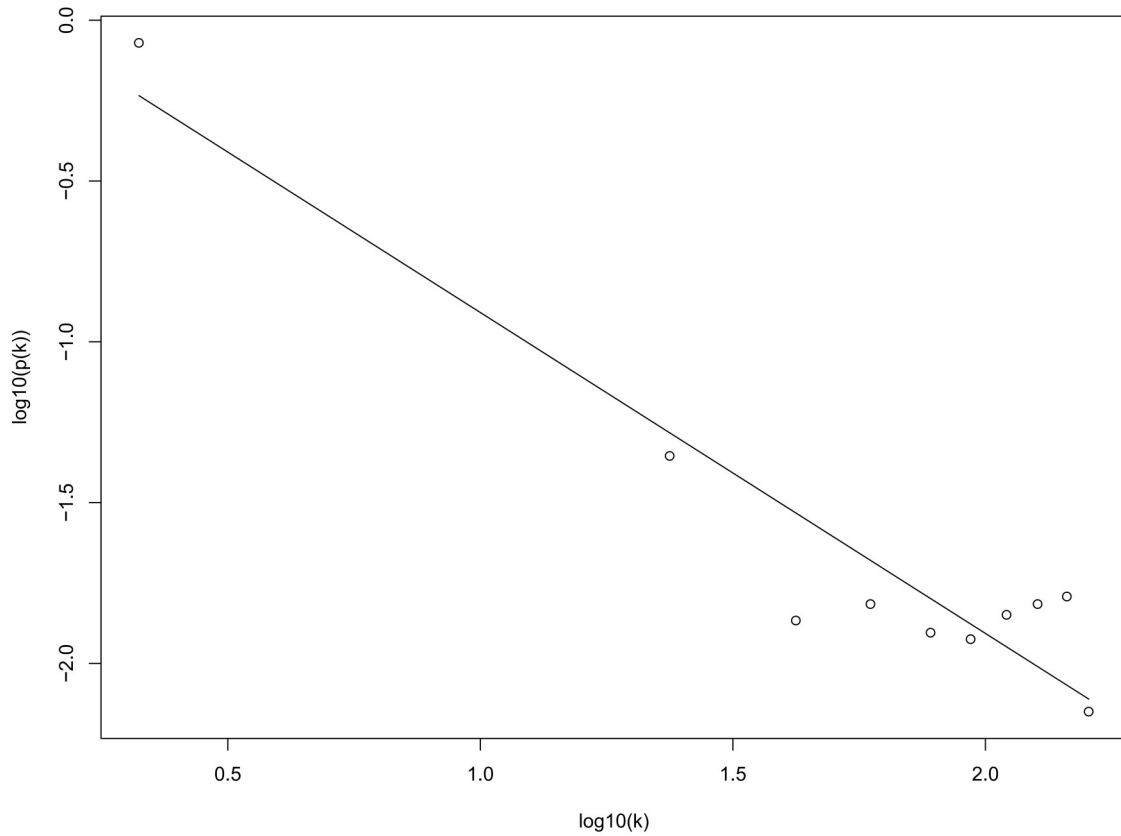

Supplement: 10020_2019_135_MOESM2_ESM.pdf [file 10020_2019_135_MOESM2_ESM.pdf]
