# Supplementary material for: Identification of biomarkers in common chronic lung diseases by co-expression networks and drug-target interactions analysis
Source: PubMed Central journal article supplement (PMC6969427; doi:10.1186/s10020-019-0135-9), 2020-01-17

# Selecting optimal $\beta$ parameter for Asthma-COPD

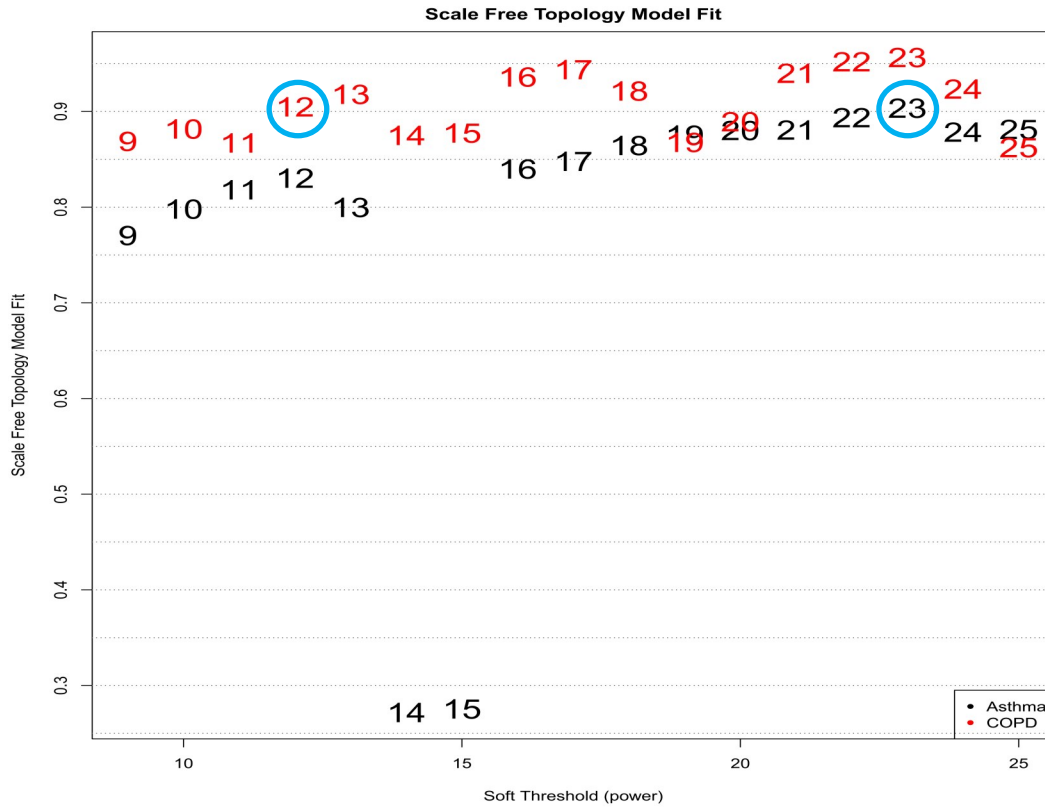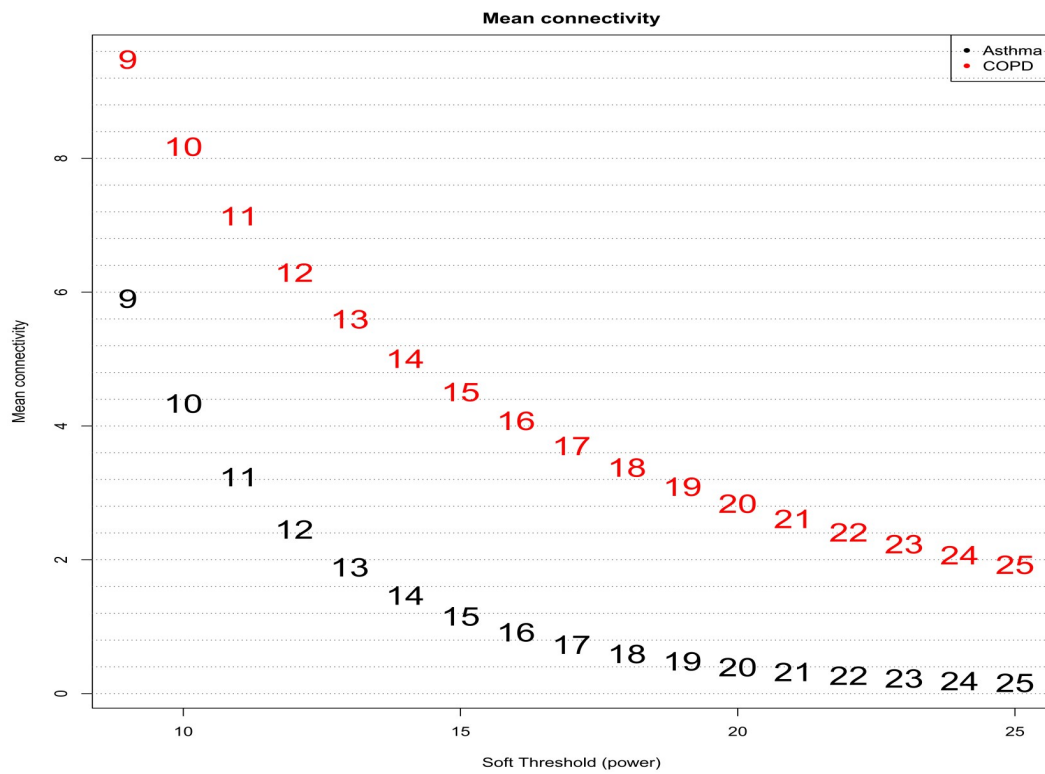

# Selecting optimal $\beta$ parameter for Asthma-IPF

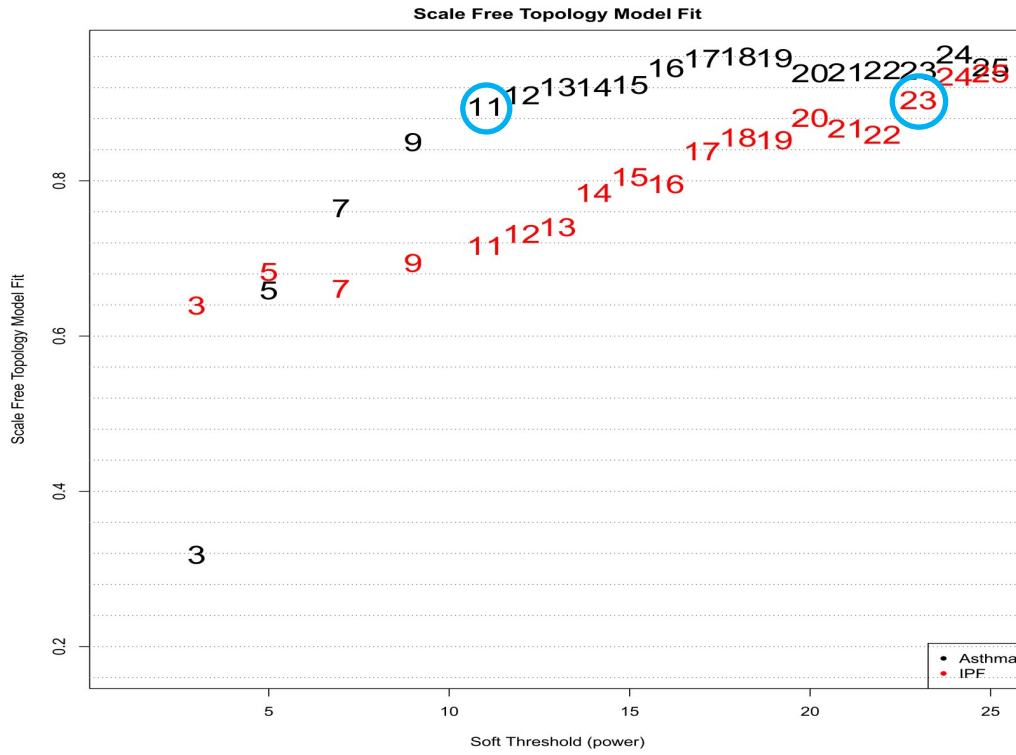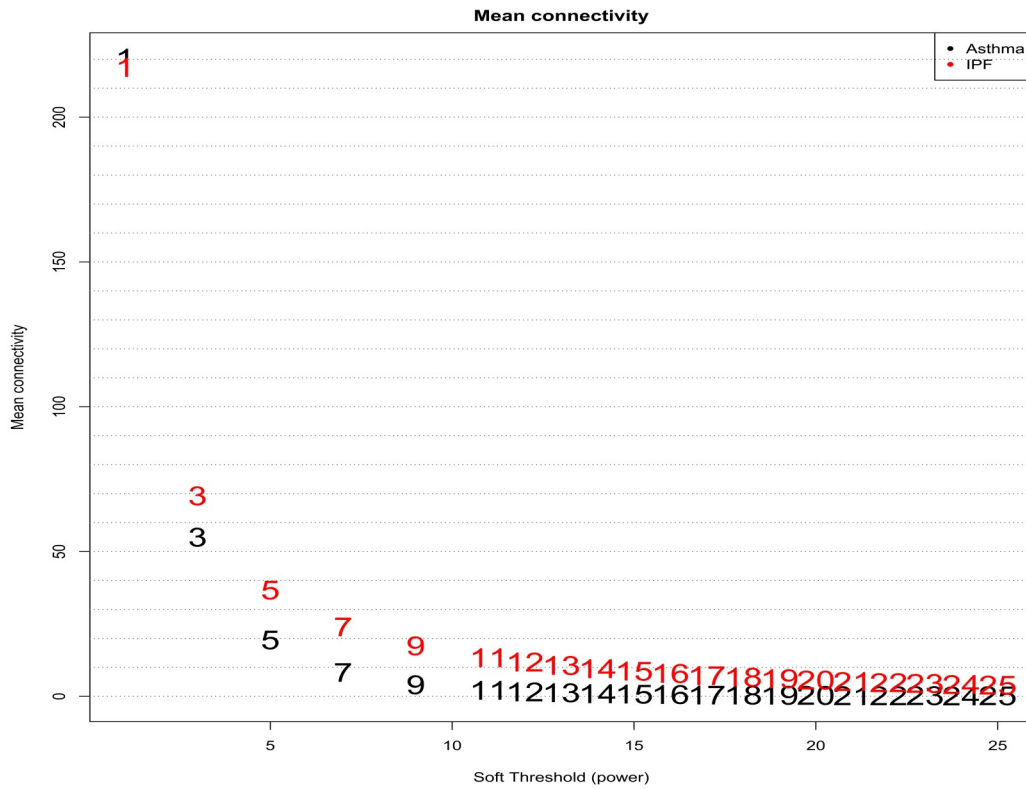

# Selecting optimal $\beta$ parameter for COPD-IPF

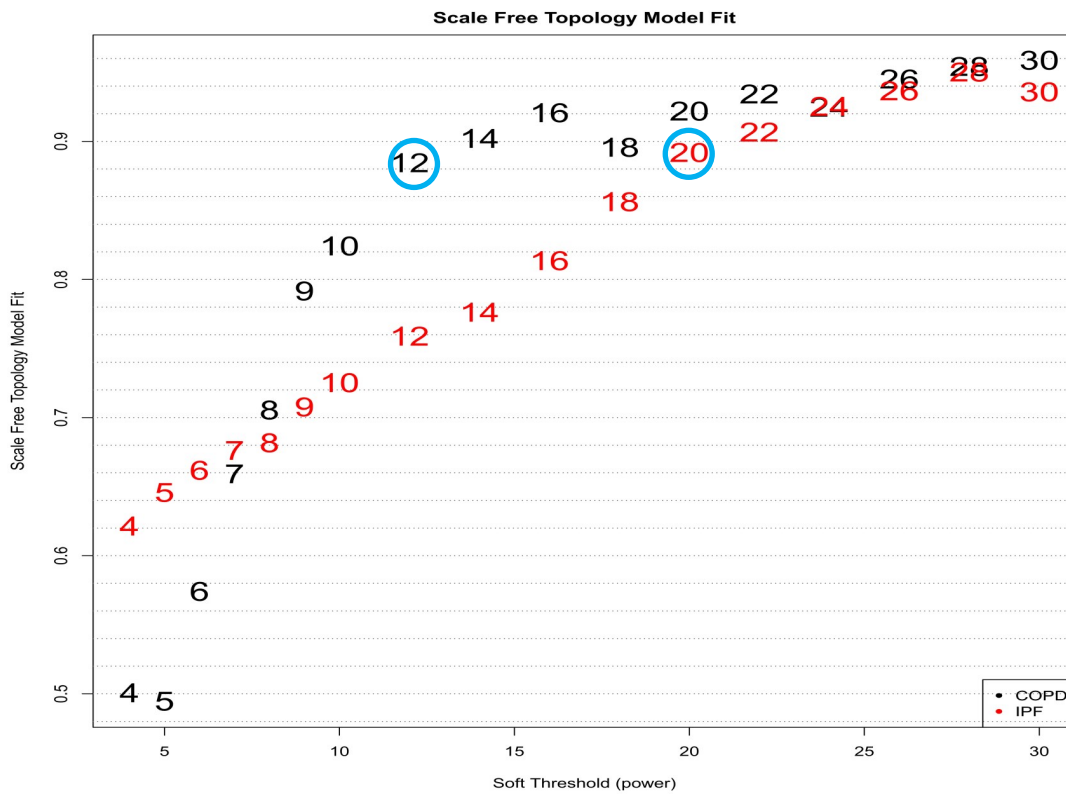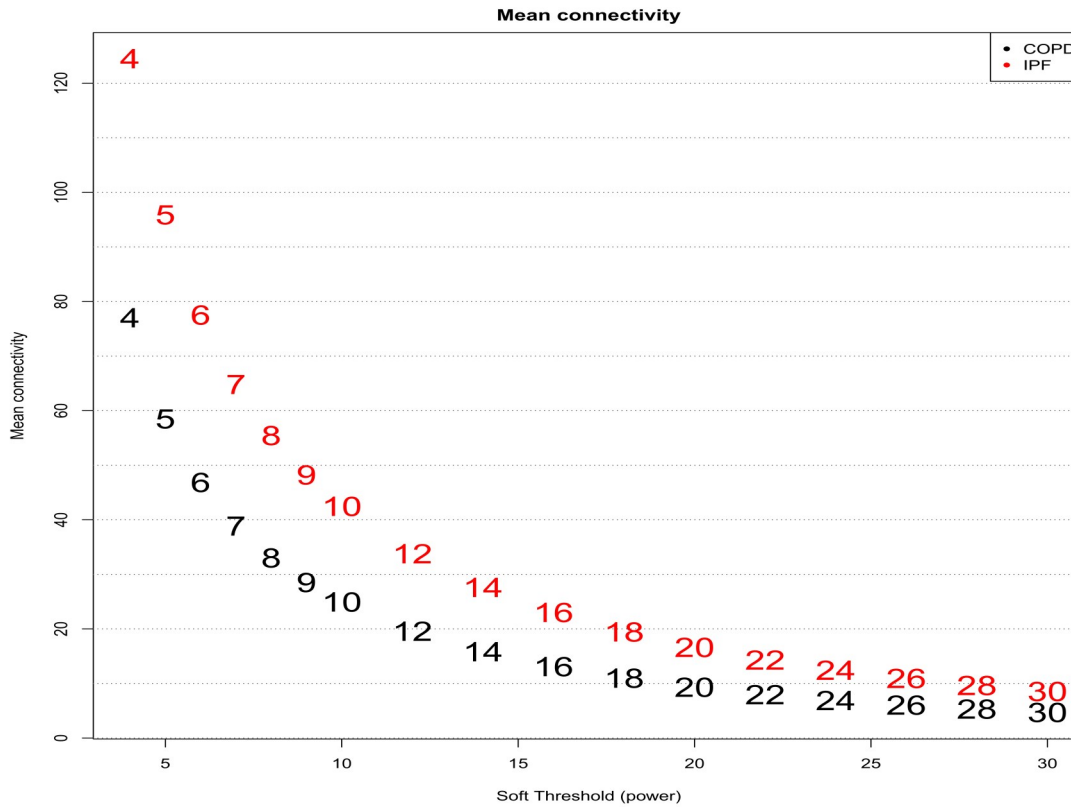

Supplement: 10020_2019_135_MOESM5_ESM.pdf [file 10020_2019_135_MOESM5_ESM.pdf]
